# Supplementary material for: Metal–organic frameworks based on naphthalene-1,5-diyldioxy-di-acetate: structures, topologies, photoluminescence and photocatalytic properties
Source: Royal Society of Chemistry journal article supplement (doi:10.1039/c2ce06529k), 2012-01-01
Supplement: c2ce06529k_2.pdf [file c2ce06529k_2.pdf]

#####  
1:C17 H17 Mn N O7  
#####

Structure consists of molecules (ZD1). The composition of molecule is Sc  
Structure consists of molecules (ZD2). The composition of molecule is Sc  
Structure consists of molecules (ZE1). The composition of molecule is Mn  
Structure consists of molecules (ZE2). The composition of molecule is Mn  
Topology for ZD1

-----  
Atom ZD1 links by bridge ligands and has  
Common vertex with

|      |        |        |        |          | R(A-A) | f | Total SA |
|------|--------|--------|--------|----------|--------|---|----------|
| ZE 1 | 1.0000 | 0.5000 | 0.5000 | ( 1 0 0) | 6.413A | 1 | 16.74    |
| ZE 1 | 0.0000 | 0.5000 | 0.5000 | ( 0 0 0) | 6.413A | 1 | 16.74    |
| ZE 2 | 1.0000 | 0.5938 | 0.7500 | ( 1 1 1) | 7.283A | 1 | 17.17    |
| ZE 2 | 0.0000 | 0.4062 | 0.2500 | ( 0 0 0) | 7.283A | 1 | 17.17    |
| ZE 1 | 1.0000 | 0.5000 | 1.0000 | ( 1 0 1) | 7.843A | 1 | 16.09    |
| ZE 1 | 0.0000 | 0.5000 | 0.0000 | ( 0 0 0) | 7.843A | 1 | 16.09    |

Topology for ZD2

-----  
Atom ZD2 links by bridge ligands and has  
Common vertex with

|      |        |        |        |          | R(A-A) | f | Total SA |
|------|--------|--------|--------|----------|--------|---|----------|
| ZE 2 | 1.0000 | 0.5938 | 0.7500 | ( 1 1 1) | 5.991A | 1 | 24.53    |
| ZE 2 | 0.5000 | 0.9062 | 0.2500 | ( 0 0 0) | 5.991A | 1 | 24.53    |
| ZE 1 | 1.0000 | 0.5000 | 0.5000 | ( 1 0 0) | 7.927A | 1 | 25.47    |
| ZE 1 | 0.5000 | 1.0000 | 0.5000 | ( 0 1 1) | 7.927A | 1 | 25.47    |

Topology for ZE1

-----  
Atom ZE1 links by bridge ligands and has  
Common vertex with

|      |         |        |        |          | R(A-A) | f | Total SA |
|------|---------|--------|--------|----------|--------|---|----------|
| ZD 1 | 0.5000  | 0.5000 | 0.5000 | ( 0 0 0) | 6.413A | 1 | 16.43    |
| ZD 1 | -0.5000 | 0.5000 | 0.5000 | (-1 0 0) | 6.413A | 1 | 16.43    |
| ZD 1 | -0.5000 | 0.5000 | 0.0000 | ( 0 0 0) | 7.843A | 1 | 15.79    |
| ZD 1 | 0.5000  | 0.5000 | 1.0000 | ( 1 0 1) | 7.843A | 1 | 15.79    |
| ZD 2 | -0.2500 | 0.7500 | 0.5000 | (-1 0 0) | 7.927A | 1 | 17.78    |
| ZD 2 | 0.2500  | 0.2500 | 0.5000 | ( 1 1 1) | 7.927A | 1 | 17.78    |

Topology for ZE2

-----  
Atom ZE2 links by bridge ligands and has  
Common vertex with

|      |         |        |        |          | R(A-A) | f | Total SA |
|------|---------|--------|--------|----------|--------|---|----------|
| ZD 2 | -0.2500 | 0.2500 | 0.0000 | (-1 1-1) | 5.991A | 1 | 25.20    |
| ZD 2 | 0.2500  | 0.2500 | 0.5000 | ( 1 1 1) | 5.991A | 1 | 25.20    |
| ZD 1 | -0.5000 | 0.5000 | 0.0000 | ( 0 0 0) | 7.283A | 1 | 24.80    |
| ZD 1 | 0.5000  | 0.5000 | 0.5000 | ( 0 0 0) | 7.283A | 1 | 24.80    |

-----  
Structural group analysis

-----  
Structural group No 1

-----  
Structure consists of 3D framework with ZE2D

-----  
Coordination sequences

-----  
ZD1: 1 2 3 4 5 6 7 8 9 10  
Num 6 16 36 70 114 172 240 318 414 518  
Cum 7 23 59 129 243 415 655 973 1387 1905

-----  
ZD2: 1 2 3 4 5 6 7 8 9 10  
Num 4 12 30 58 100 152 216 294 384 486  
Cum 5 17 47 105 205 357 573 867 1251 1737

-----  
ZE1: 1 2 3 4 5 6 7 8 9 10  
Num 6 18 38 70 114 170 240 322 416 522  
Cum 7 25 63 133 247 417 657 979 1395 1917

-----  
ZE2: 1 2 3 4 5 6 7 8 9 10  
Num 4 12 28 56 100 150 216 292 382 480  
Cum 5 17 45 101 201 351 567 859 1241 1721

-----  
TD10=1820

-----  
Vertex symbols for selected sublattice

-----  
ZD1 Point (Schlafli) symbol:{4^8;6^6;8}  
Extended point symbol:[4.4.4.4.4(2).4(2).4(2).4(2).6(2).6(2).6(2).6(2).6(3).6(3).8(12)]

-----  
ZD2 Point (Schlafli) symbol:{4^2;6^3;8}  
Extended point symbol:[4(2).4(2).6(2).8(32).6(3).6(3)]

-----  
ZE1 Point (Schlafli) symbol:{4^8;6^6;8}  
Extended point symbol:[4.4.4.4.4.4.4(2).4(2).6.6.6(3).6(3).6(4).6(4).8(6)]

-----  
ZE2 Point (Schlafli) symbol:{4^5;6}

Point (Schlafli) symbol for net: {4<sup>2</sup>;6<sup>3</sup>;8}{4<sup>5</sup>;6}{4<sup>8</sup>;6<sup>6</sup>;8}2  
4,6-c net with stoichiometry (4-c)(6-c); 4-nodal net

New topology, please, contact the authors (67371 types in 9 databases)

-----  
Non-equivalent circuits  
-----

Circuit No 1; Type=4a; Centroid: (0.000,0.523,0.688)

-----  
Atom            x            y            z  
-----  
ZD1            -0.5000    0.5000    0.5000  
ZE2            0.0000    0.5938    0.7500  
ZD1            0.5000    0.5000    1.0000  
ZE1            0.0000    0.5000    0.5000  
-----

Circuit No 2; Type=4b; Centroid: (0.813,0.586,0.563)

-----  
Atom            x            y            z  
-----  
ZD1            0.5000    0.5000    0.5000  
ZE2            1.0000    0.5938    0.7500  
ZD2            0.7500    0.7500    0.5000  
ZE1            1.0000    0.5000    0.5000  
-----

Circuit No 3; Type=4c; Centroid: (0.000,0.500,0.750)

-----  
Atom            x            y            z  
-----  
ZD1            -0.5000    0.5000    0.5000  
ZE1            0.0000    0.5000    1.0000  
ZD1            0.5000    0.5000    1.0000  
ZE1            0.0000    0.5000    0.5000  
-----

Circuit No 4; Type=4d; Centroid: (0.500,0.500,0.250)

-----  
Atom            x            y            z  
-----  
ZD1            0.5000    0.5000    0.5000  
ZE1            0.0000    0.5000    0.0000  
ZD1            0.5000    0.5000    0.0000  
ZE1            1.0000    0.5000    0.5000  
-----

Circuit No 5; Type=4e; Centroid: (0.938,0.586,0.813)

-----  
Atom            x            y            z  
-----  
ZD1            0.5000    0.5000    0.5000  
ZE1            1.0000    0.5000    1.0000  
ZD2            1.2500    0.7500    1.0000  
ZE2            1.0000    0.5938    0.7500  
-----

Circuit No 6; Type=6a; Centroid: (0.750,0.500,0.750)

-----  
Atom            x            y            z  
-----  
ZD1            0.5000    0.5000    0.5000  
ZE1            1.0000    0.5000    0.5000  
ZD1            1.5000    0.5000    1.0000  
ZE1            1.0000    0.5000    1.0000  
ZD1            0.5000    0.5000    1.0000  
ZE1            0.0000    0.5000    0.5000  
-----

Circuit No 7; Type=6b; Centroid: (0.250,0.484,0.208)

-----  
Atom            x            y            z  
-----  
ZD1            0.5000    0.5000    0.5000  
ZE1            1.0000    0.5000    0.5000  
ZD1            0.5000    0.5000    0.0000  
ZE1            0.0000    0.5000    0.0000  
ZD1            -0.5000    0.5000    0.0000  
ZE2            0.0000    0.4062    0.2500  
-----

Circuit No 8; Type=6c; Centroid: (0.292,0.443,0.208)

-----  
Atom            x            y            z  
-----  
ZD1            0.5000    0.5000    0.5000  
ZE1            1.0000    0.5000    0.5000  
ZD1            0.5000    0.5000    0.0000  
ZE1            0.0000    0.5000    0.0000  
-----

ZD2 -0.2500 0.2500 0.0000  
ZE2 0.0000 0.4062 0.2500

Circuit No 9; Type=6d; Centroid: (0.500,0.667,0.333)

| Atom | x      | y      | z      |
|------|--------|--------|--------|
| ZD1  | 0.5000 | 0.5000 | 0.5000 |
| ZE2  | 1.0000 | 0.5938 | 0.7500 |
| ZD2  | 0.7500 | 0.7500 | 0.5000 |
| ZE2  | 0.5000 | 0.9062 | 0.2500 |
| ZD2  | 0.2500 | 0.7500 | 0.0000 |
| ZE1  | 0.0000 | 0.5000 | 0.0000 |

Circuit No 10; Type=6e; Centroid: (0.750,0.516,0.458)

| Atom | x      | y      | z      |
|------|--------|--------|--------|
| ZD1  | 0.5000 | 0.5000 | 0.5000 |
| ZE2  | 1.0000 | 0.5938 | 0.7500 |
| ZD1  | 1.5000 | 0.5000 | 1.0000 |
| ZE1  | 1.0000 | 0.5000 | 0.5000 |
| ZD1  | 0.5000 | 0.5000 | 0.0000 |
| ZE1  | 0.0000 | 0.5000 | 0.0000 |

Circuit No 11; Type=6f; Centroid: (0.625,0.557,0.375)

| Atom | x      | y      | z      |
|------|--------|--------|--------|
| ZD1  | 0.5000 | 0.5000 | 0.5000 |
| ZE2  | 1.0000 | 0.5938 | 0.7500 |
| ZD2  | 0.7500 | 0.7500 | 0.5000 |
| ZE1  | 1.0000 | 0.5000 | 0.5000 |
| ZD1  | 0.5000 | 0.5000 | 0.0000 |
| ZE1  | 0.0000 | 0.5000 | 0.0000 |

Circuit No 12; Type=6g; Centroid: (0.750,0.500,0.500)

| Atom | x      | y      | z      |
|------|--------|--------|--------|
| ZD1  | 0.5000 | 0.5000 | 0.5000 |
| ZE1  | 1.0000 | 0.5000 | 1.0000 |
| ZD1  | 1.5000 | 0.5000 | 1.0000 |
| ZE1  | 1.0000 | 0.5000 | 0.5000 |
| ZD1  | 0.5000 | 0.5000 | 0.0000 |
| ZE1  | 0.0000 | 0.5000 | 0.0000 |

Circuit No 13; Type=6h; Centroid: (0.000,0.849,0.792)

| Atom | x       | y      | z      |
|------|---------|--------|--------|
| ZD2  | -0.2500 | 0.7500 | 0.5000 |
| ZE2  | 0.0000  | 0.5938 | 0.7500 |
| ZD2  | 0.2500  | 0.7500 | 1.0000 |
| ZE1  | 0.5000  | 1.0000 | 1.0000 |
| ZD1  | 0.0000  | 1.0000 | 1.0000 |
| ZE1  | -0.5000 | 1.0000 | 0.5000 |

Circuit No 14; Type=6i; Centroid: (0.083,0.401,0.292)

| Atom | x       | y      | z      |
|------|---------|--------|--------|
| ZE2  | 0.0000  | 0.4062 | 0.2500 |
| ZD2  | -0.2500 | 0.2500 | 0.0000 |
| ZE1  | 0.0000  | 0.5000 | 0.0000 |
| ZD1  | 0.5000  | 0.5000 | 0.5000 |
| ZE1  | 0.0000  | 0.5000 | 0.5000 |
| ZD2  | 0.2500  | 0.2500 | 0.5000 |

Circuit No 15; Type=8a; Centroid: (0.313,0.613,0.281)

| Atom | x       | y      | z      |
|------|---------|--------|--------|
| ZD1  | 0.5000  | 0.5000 | 0.5000 |
| ZE2  | 0.0000  | 0.4062 | 0.2500 |
| ZD1  | -0.5000 | 0.5000 | 0.0000 |
| ZE1  | 0.0000  | 0.5000 | 0.0000 |
| ZD2  | 0.2500  | 0.7500 | 0.0000 |
| ZE2  | 0.5000  | 0.9062 | 0.2500 |
| ZD2  | 0.7500  | 0.7500 | 0.5000 |
| ZE2  | 1.0000  | 0.5938 | 0.7500 |

Circuit No 16; Type=8b; Centroid: (0.344,0.582,0.281)

| Atom | x | y | z |
|------|---|---|---|
|------|---|---|---|

|     |         |        |        |
|-----|---------|--------|--------|
| ZD1 | 0.5000  | 0.5000 | 0.5000 |
| ZE2 | 0.0000  | 0.4062 | 0.2500 |
| ZD2 | -0.2500 | 0.2500 | 0.0000 |
| ZE1 | 0.0000  | 0.5000 | 0.0000 |
| ZD2 | 0.2500  | 0.7500 | 0.0000 |
| ZE2 | 0.5000  | 0.9062 | 0.2500 |
| ZD2 | 0.7500  | 0.7500 | 0.5000 |
| ZE2 | 1.0000  | 0.5938 | 0.7500 |

Circuit No 17; Type=8c; Centroid: (0.500,0.500,0.375)

| Atom | x       | y      | z      |
|------|---------|--------|--------|
| ZD1  | 0.5000  | 0.5000 | 0.5000 |
| ZE2  | 0.0000  | 0.4062 | 0.2500 |
| ZD1  | -0.5000 | 0.5000 | 0.0000 |
| ZE1  | 0.0000  | 0.5000 | 0.0000 |
| ZD1  | 0.5000  | 0.5000 | 0.0000 |
| ZE1  | 1.0000  | 0.5000 | 0.5000 |
| ZD1  | 1.5000  | 0.5000 | 1.0000 |
| ZE2  | 1.0000  | 0.5938 | 0.7500 |

Circuit No 18; Type=8d; Centroid: (0.531,0.469,0.375)

| Atom | x       | y      | z      |
|------|---------|--------|--------|
| ZD1  | 0.5000  | 0.5000 | 0.5000 |
| ZE2  | 0.0000  | 0.4062 | 0.2500 |
| ZD2  | -0.2500 | 0.2500 | 0.0000 |
| ZE1  | 0.0000  | 0.5000 | 0.0000 |
| ZD1  | 0.5000  | 0.5000 | 0.0000 |
| ZE1  | 1.0000  | 0.5000 | 0.5000 |
| ZD1  | 1.5000  | 0.5000 | 1.0000 |
| ZE2  | 1.0000  | 0.5938 | 0.7500 |

Circuit No 19; Type=8e; Centroid: (0.406,0.531,0.313)

| Atom | x       | y      | z      |
|------|---------|--------|--------|
| ZD1  | 0.5000  | 0.5000 | 0.5000 |
| ZE2  | 0.0000  | 0.4062 | 0.2500 |
| ZD1  | -0.5000 | 0.5000 | 0.0000 |
| ZE1  | 0.0000  | 0.5000 | 0.0000 |
| ZD1  | 0.5000  | 0.5000 | 0.0000 |
| ZE1  | 1.0000  | 0.5000 | 0.5000 |
| ZD2  | 0.7500  | 0.7500 | 0.5000 |
| ZE2  | 1.0000  | 0.5938 | 0.7500 |

Circuit No 20; Type=8f; Centroid: (0.438,0.500,0.313)

| Atom | x       | y      | z      |
|------|---------|--------|--------|
| ZD1  | 0.5000  | 0.5000 | 0.5000 |
| ZE2  | 0.0000  | 0.4062 | 0.2500 |
| ZD2  | -0.2500 | 0.2500 | 0.0000 |
| ZE1  | 0.0000  | 0.5000 | 0.0000 |
| ZD1  | 0.5000  | 0.5000 | 0.0000 |
| ZE1  | 1.0000  | 0.5000 | 0.5000 |
| ZD2  | 0.7500  | 0.7500 | 0.5000 |
| ZE2  | 1.0000  | 0.5938 | 0.7500 |

Circuit No 21; Type=8g; Centroid: (0.250,0.762,0.531)

| Atom | x       | y      | z      |
|------|---------|--------|--------|
| ZD2  | -0.2500 | 0.7500 | 0.5000 |
| ZE1  | -0.5000 | 1.0000 | 0.5000 |
| ZD1  | 0.0000  | 1.0000 | 0.5000 |
| ZE1  | 0.5000  | 1.0000 | 0.5000 |
| ZD2  | 0.7500  | 0.7500 | 0.5000 |
| ZE2  | 1.0000  | 0.5938 | 0.7500 |
| ZD1  | 0.5000  | 0.5000 | 0.5000 |
| ZE1  | 0.0000  | 0.5000 | 0.5000 |

Circuit No 22; Type=8h; Centroid: (0.250,0.750,0.500)

| Atom | x       | y      | z      |
|------|---------|--------|--------|
| ZD2  | -0.2500 | 0.7500 | 0.5000 |
| ZE1  | -0.5000 | 1.0000 | 0.5000 |
| ZD1  | 0.0000  | 1.0000 | 0.5000 |
| ZE1  | 0.5000  | 1.0000 | 0.5000 |
| ZD2  | 0.7500  | 0.7500 | 0.5000 |
| ZE1  | 1.0000  | 0.5000 | 0.5000 |

ZD1 0.5000 0.5000 0.5000  
 ZE1 0.0000 0.5000 0.5000

Circuit No 23; Type=8i; Centroid: (0.250,0.750,0.000)

| Atom | x       | y      | z       |
|------|---------|--------|---------|
| ZD2  | 0.7500  | 0.7500 | 0.5000  |
| ZE1  | 0.5000  | 1.0000 | 0.5000  |
| ZD1  | 0.0000  | 1.0000 | 0.0000  |
| ZE1  | -0.5000 | 1.0000 | -0.5000 |
| ZD2  | -0.2500 | 0.7500 | -0.5000 |
| ZE1  | 0.0000  | 0.5000 | -0.5000 |
| ZD1  | 0.5000  | 0.5000 | 0.0000  |
| ZE1  | 1.0000  | 0.5000 | 0.5000  |

Crossed with bonds

| No  | Atom | x      | y      | z      | Atom | x      | y      | z       | Dist. | N Cycles               |
|-----|------|--------|--------|--------|------|--------|--------|---------|-------|------------------------|
| * 1 | ZD2  | 0.2500 | 0.7500 | 0.0000 | ZE2  | 0.0000 | 0.5938 | -0.2500 | 5.991 | 4e/1 6c/1 8b/1 8d/1 8f |
| * 1 | ZD2  | 0.2500 | 0.7500 | 0.0000 | ZE2  | 0.5000 | 0.9062 | 0.2500  | 5.991 | 4e/1 6c/1 8b/1 8d/1 8f |
| * 2 | ZD2  | 0.2500 | 0.7500 | 0.0000 | ZE1  | 0.0000 | 0.5000 | 0.0000  | 7.927 | 4e/1 6c/1 8b/1 8d/1 8f |
| * 2 | ZD2  | 0.2500 | 0.7500 | 0.0000 | ZE1  | 0.5000 | 1.0000 | 0.0000  | 7.927 | 4e/1 6c/1 8b/1 8d/1 8f |

Circuit No 24; Type=8j; Centroid: (0.250,0.762,0.031)

| Atom | x       | y      | z       |
|------|---------|--------|---------|
| ZD2  | 0.7500  | 0.7500 | 0.5000  |
| ZE1  | 0.5000  | 1.0000 | 0.5000  |
| ZD1  | 0.0000  | 1.0000 | 0.0000  |
| ZE1  | -0.5000 | 1.0000 | -0.5000 |
| ZD2  | -0.2500 | 0.7500 | -0.5000 |
| ZE2  | 0.0000  | 0.5938 | -0.2500 |
| ZD1  | 0.5000  | 0.5000 | 0.0000  |
| ZE1  | 1.0000  | 0.5000 | 0.5000  |

Crossed with bonds

| No  | Atom | x      | y      | z      | Atom | x      | y      | z      | Dist. | N Cycles               |
|-----|------|--------|--------|--------|------|--------|--------|--------|-------|------------------------|
| * 2 | ZD2  | 0.2500 | 0.7500 | 0.0000 | ZE1  | 0.0000 | 0.5000 | 0.0000 | 7.927 | 8i/1 8i/1 8j/1 8j/1 8j |

Circuit No 25; Type=8k; Centroid: (0.438,0.750,0.188)

| Atom | x      | y      | z       |
|------|--------|--------|---------|
| ZD2  | 0.7500 | 0.7500 | 0.5000  |
| ZE1  | 0.5000 | 1.0000 | 0.5000  |
| ZD1  | 0.0000 | 1.0000 | 0.0000  |
| ZE2  | 0.5000 | 0.9062 | 0.2500  |
| ZD2  | 0.2500 | 0.7500 | 0.0000  |
| ZE2  | 0.0000 | 0.5938 | -0.2500 |
| ZD1  | 0.5000 | 0.5000 | 0.0000  |
| ZE1  | 1.0000 | 0.5000 | 0.5000  |

Circuit No 26; Type=8l; Centroid: (0.563,0.750,0.250)

| Atom | x      | y      | z       |
|------|--------|--------|---------|
| ZD2  | 0.7500 | 0.7500 | 0.5000  |
| ZE1  | 0.5000 | 1.0000 | 0.5000  |
| ZD1  | 1.0000 | 1.0000 | 0.5000  |
| ZE2  | 0.5000 | 0.9062 | 0.2500  |
| ZD2  | 0.2500 | 0.7500 | 0.0000  |
| ZE2  | 0.0000 | 0.5938 | -0.2500 |
| ZD1  | 0.5000 | 0.5000 | 0.0000  |
| ZE1  | 1.0000 | 0.5000 | 0.5000  |

Circuit No 27; Type=8m; Centroid: (0.438,0.762,0.156)

| Atom | x      | y      | z       |
|------|--------|--------|---------|
| ZD2  | 0.7500 | 0.7500 | 0.5000  |
| ZE1  | 0.5000 | 1.0000 | 0.5000  |
| ZD1  | 0.0000 | 1.0000 | 0.0000  |
| ZE1  | 0.5000 | 1.0000 | 0.0000  |
| ZD2  | 0.2500 | 0.7500 | 0.0000  |
| ZE2  | 0.0000 | 0.5938 | -0.2500 |
| ZD1  | 0.5000 | 0.5000 | 0.0000  |
| ZE1  | 1.0000 | 0.5000 | 0.5000  |

Circuit No 28; Type=8n; Centroid: (0.563,0.762,0.219)

| Atom | x      | y      | z       |
|------|--------|--------|---------|
| ZD2  | 0.7500 | 0.7500 | 0.5000  |
| ZE1  | 0.5000 | 1.0000 | 0.5000  |
| ZD1  | 1.0000 | 1.0000 | 0.5000  |
| ZE1  | 0.5000 | 1.0000 | 0.0000  |
| ZD2  | 0.2500 | 0.7500 | 0.0000  |
| ZE2  | 0.0000 | 0.5938 | -0.2500 |
| ZD1  | 0.5000 | 0.5000 | 0.0000  |
| ZE1  | 1.0000 | 0.5000 | 0.5000  |

Circuit No 29; Type=8o; Centroid: (0.438,0.738,0.219)

| Atom | x      | y      | z      |
|------|--------|--------|--------|
| ZD2  | 0.7500 | 0.7500 | 0.5000 |
| ZE1  | 0.5000 | 1.0000 | 0.5000 |
| ZD1  | 0.0000 | 1.0000 | 0.0000 |
| ZE2  | 0.5000 | 0.9062 | 0.2500 |
| ZD2  | 0.2500 | 0.7500 | 0.0000 |
| ZE1  | 0.0000 | 0.5000 | 0.0000 |
| ZD1  | 0.5000 | 0.5000 | 0.0000 |
| ZE1  | 1.0000 | 0.5000 | 0.5000 |

Circuit No 30; Type=8p; Centroid: (0.563,0.738,0.281)

| Atom | x      | y      | z      |
|------|--------|--------|--------|
| ZD2  | 0.7500 | 0.7500 | 0.5000 |
| ZE1  | 0.5000 | 1.0000 | 0.5000 |
| ZD1  | 1.0000 | 1.0000 | 0.5000 |
| ZE2  | 0.5000 | 0.9062 | 0.2500 |
| ZD2  | 0.2500 | 0.7500 | 0.0000 |
| ZE1  | 0.0000 | 0.5000 | 0.0000 |
| ZD1  | 0.5000 | 0.5000 | 0.0000 |
| ZE1  | 1.0000 | 0.5000 | 0.5000 |

Circuit No 31; Type=8q; Centroid: (0.438,0.738,0.281)

| Atom | x      | y      | z      |
|------|--------|--------|--------|
| ZD2  | 0.7500 | 0.7500 | 0.5000 |
| ZE1  | 0.5000 | 1.0000 | 0.5000 |
| ZD1  | 0.0000 | 1.0000 | 0.0000 |
| ZE2  | 0.5000 | 0.9062 | 0.2500 |
| ZD2  | 0.2500 | 0.7500 | 0.0000 |
| ZE1  | 0.0000 | 0.5000 | 0.0000 |
| ZD1  | 0.5000 | 0.5000 | 0.5000 |
| ZE1  | 1.0000 | 0.5000 | 0.5000 |

Circuit No 32; Type=8r; Centroid: (0.563,0.738,0.344)

| Atom | x      | y      | z      |
|------|--------|--------|--------|
| ZD2  | 0.7500 | 0.7500 | 0.5000 |
| ZE1  | 0.5000 | 1.0000 | 0.5000 |
| ZD1  | 1.0000 | 1.0000 | 0.5000 |
| ZE2  | 0.5000 | 0.9062 | 0.2500 |
| ZD2  | 0.2500 | 0.7500 | 0.0000 |
| ZE1  | 0.0000 | 0.5000 | 0.0000 |
| ZD1  | 0.5000 | 0.5000 | 0.5000 |
| ZE1  | 1.0000 | 0.5000 | 0.5000 |

Circuit No 33; Type=8s; Centroid: (0.438,0.750,0.188)

| Atom | x      | y      | z      |
|------|--------|--------|--------|
| ZD2  | 0.7500 | 0.7500 | 0.5000 |
| ZE1  | 0.5000 | 1.0000 | 0.5000 |
| ZD1  | 0.0000 | 1.0000 | 0.0000 |
| ZE1  | 0.5000 | 1.0000 | 0.0000 |
| ZD2  | 0.2500 | 0.7500 | 0.0000 |
| ZE1  | 0.0000 | 0.5000 | 0.0000 |
| ZD1  | 0.5000 | 0.5000 | 0.0000 |
| ZE1  | 1.0000 | 0.5000 | 0.5000 |

Circuit No 34; Type=8t; Centroid: (0.563,0.750,0.250)

| Atom | x      | y      | z      |
|------|--------|--------|--------|
| ZD2  | 0.7500 | 0.7500 | 0.5000 |
| ZE1  | 0.5000 | 1.0000 | 0.5000 |
| ZD1  | 1.0000 | 1.0000 | 0.5000 |
| ZE1  | 0.5000 | 1.0000 | 0.0000 |
| ZD2  | 0.2500 | 0.7500 | 0.0000 |

```
ZE1 0.0000 0.5000 0.0000
ZD1 0.5000 0.5000 0.0000
ZE1 1.0000 0.5000 0.5000
```

Circuit No 35; Type=8u; Centroid: (0.250,0.500,0.625)

```
-----
Atom      x      y      z
-----
ZE1      0.0000  0.5000  0.5000
ZD2      0.2500  0.2500  0.5000
ZE2      0.0000  0.4062  0.2500
ZD1      0.5000  0.5000  0.5000
ZE1      1.0000  0.5000  1.0000
ZD1      0.5000  0.5000  1.0000
ZE2      0.0000  0.5938  0.7500
ZD2     -0.2500  0.7500  0.5000
```

Circuit No 36; Type=8v; Centroid: (0.344,0.430,0.750)

```
-----
Atom      x      y      z
-----
ZE1      0.0000  0.5000  0.5000
ZD2      0.2500  0.2500  0.5000
ZE2      0.5000  0.0938  0.7500
ZD2      0.7500  0.2500  1.0000
ZE1      1.0000  0.5000  1.0000
ZD1      0.5000  0.5000  1.0000
ZE2      0.0000  0.5938  0.7500
ZD2     -0.2500  0.7500  0.5000
```

Ring links

```
-----
Cycle 1 | Cycle 2 | Chain | Cross | Link | Hopf | Mult
-----
8i | 8i | 1 | 1 | 1 | * | 2
8i | 8j | 1 | 1 | 1 | * | 4
8j | 8i | 1 | 1 | 1 | * | 2
8j | 8j | 1 | 1 | 1 | * | 3
-----
```

Elapsed time: 30.02 sec.
