# Supplementary material for: Metal–organic frameworks based on naphthalene-1,5-diyldioxy-di-acetate: structures, topologies, photoluminescence and photocatalytic properties
Source: Royal Society of Chemistry journal article supplement (doi:10.1039/c2ce06529k), 2012-01-01
Supplement: c2ce06529k_4.pdf [file c2ce06529k_4.pdf]

#####  
1:C17 H17 N O7 Pb  
#####

Structure consists of molecules (ZD1). The composition of molecule is Sc  
Structure consists of molecules (ZE1). The composition of molecule is Pb  
Topology for ZD1

-----  
Atom ZD1 links by bridge ligands and has  
Common vertex with

|      |         |        |         | R(A-A)   | f      | Total SA |
|------|---------|--------|---------|----------|--------|----------|
| ZE 1 | -0.1601 | 0.7948 | 0.0499  | (-1 0 0) | 7.022A | 1 30.06  |
| ZE 1 | 0.1601  | 0.2052 | 0.9501  | ( 1 1 1) | 7.022A | 1 30.06  |
| ZE 1 | -0.1601 | 0.7052 | -0.4501 | (-1 1-1) | 8.214A | 1 19.94  |
| ZE 1 | 0.1601  | 0.2948 | 1.4501  | ( 1-1 1) | 8.214A | 1 19.94  |

Topology for ZE1

-----  
Atom ZE1 links by bridge ligands and has  
Common vertex with

|      |        |        |         | R(A-A)   | f       | Total SA |
|------|--------|--------|---------|----------|---------|----------|
| ZD 1 | 1.0000 | 0.5000 | 0.5000  | ( 1 0 0) | 7.022A  | 1 38.04  |
| ZD 1 | 1.0000 | 1.0000 | 1.0000  | ( 1 0 1) | 8.214A  | 1 25.23  |
| ZE 1 | 0.1601 | 0.2052 | -0.0499 | ( 1 1 0) | 14.473A | 1 36.73  |

-----  
Structural group analysis  
-----

-----  
Structural group No 1  
-----

Structure consists of 3D framework with ZE2ZD

-----  
Coordination sequences  
-----

ZD1: 1 2 3 4 5 6 7 8 9 10  
Num 4 8 20 38 58 88 124 156 204 256  
Cum 5 13 33 71 129 217 341 497 701 957

-----  
ZE1: 1 2 3 4 5 6 7 8 9 10  
Num 3 8 18 35 59 87 119 160 201 250  
Cum 4 12 30 65 124 211 330 490 691 941

-----  
TD10=946

-----  
Vertex symbols for selected sublattice  
-----

ZD1 Point (Schlafli) symbol:{8^5;10}  
Extended point symbol:[8(2).8(2).8(2).8(2).8(2).10(2)]

-----  
ZE1 Point (Schlafli) symbol:{8^3}  
Extended point symbol:[8.8(3).8(3)]

-----  
Point (Schlafli) symbol for net: {8^3}2{8^5;10}  
3,4-c net with stoichiometry (3-c)2(4-c); 2-nodal net

-----  
Topological type: fsh-3,4-P21/c (binodal.ttd) {8^3}2{8^5;10} - VS [8.8(3).8(3)] [8(2).8(2).8(2).8(2).8(2).\*] (

-----  
Non-equivalent circuits  
-----

Circuit No 1; Type=8a; Centroid: (0.355,0.787,0.069)

-----  
Atom x y z  
-----  
ZD1 0.0000 0.5000 -0.5000  
ZE1 0.1601 0.2052 -0.0499  
ZE1 0.8399 0.7948 0.0499  
ZD1 1.0000 1.0000 1.0000  
ZE1 0.8399 0.7052 0.5499  
ZE1 0.1601 1.2948 0.4501  
ZD1 0.0000 1.0000 0.0000  
ZE1 -0.1601 0.7948 -0.9501

Circuit No 2; Type=8b; Centroid: (0.000,0.000,0.500)

-----  
Atom x y z  
-----  
ZD1 0.0000 -0.5000 0.5000  
ZE1 -0.1601 -0.2948 -0.4501  
ZD1 0.0000 0.0000 0.0000  
ZE1 0.1601 0.2052 0.9501  
ZD1 0.0000 0.5000 0.5000  
ZE1 0.1601 0.2948 1.4501  
ZD1 0.0000 0.0000 1.0000  
ZE1 -0.1601 -0.2052 0.0499

Circuit No 3; Type=10; Centroid: (0.500,0.500,0.000)

| Atom | x       | y       | z       |
|------|---------|---------|---------|
| ZD1  | 0.0000  | 0.5000  | -0.5000 |
| ZE1  | -0.1601 | 0.7052  | -1.4501 |
| ZD1  | 0.0000  | 1.0000  | -1.0000 |
| ZE1  | 0.1601  | 1.2948  | -0.5499 |
| ZE1  | 0.8399  | 0.7052  | -0.4501 |
| ZD1  | 1.0000  | 0.5000  | 0.5000  |
| ZE1  | 1.1601  | 0.2948  | 1.4501  |
| ZD1  | 1.0000  | 0.0000  | 1.0000  |
| ZE1  | 0.8399  | -0.2948 | 0.5499  |
| ZE1  | 0.1601  | 0.2948  | 0.4501  |

Elapsed time: 17.14 sec.
