# Supplementary material for: Metal–organic frameworks based on naphthalene-1,5-diyldioxy-di-acetate: structures, topologies, photoluminescence and photocatalytic properties
Source: Royal Society of Chemistry journal article supplement (doi:10.1039/c2ce06529k), 2012-01-01
Supplement: c2ce06529k_5.pdf [file c2ce06529k_5.pdf]

#####  
1:C26 H18 Cd N2 O6  
#####

Structure consists of molecules (ZD1). The composition of molecule is Ti  
Structure consists of molecules (ZE1). The composition of molecule is Cd  
Topology for ZD1

-----  
Atom ZD1 links by bridge ligands and has  
Common vertex with

|      |        |        |         | R(A-A)   | f      | Total SA |
|------|--------|--------|---------|----------|--------|----------|
| ZE 1 | 1.0000 | 0.3998 | 0.2500  | ( 1 1 1) | 7.601A | 1 25.43  |
| ZE 1 | 0.5000 | 1.1002 | -0.2500 | ( 0 0 0) | 7.601A | 1 25.43  |
| ZE 1 | 1.0000 | 0.6002 | 0.7500  | ( 1 0 0) | 8.044A | 1 24.57  |
| ZE 1 | 0.5000 | 0.8998 | -0.7500 | ( 0 1-2) | 8.044A | 1 24.57  |

Topology for ZE1

-----  
Atom ZE1 links by bridge ligands and has  
Common vertex with

|      |         |        |        | R(A-A)   | f      | Total SA |
|------|---------|--------|--------|----------|--------|----------|
| ZD 1 | 0.2500  | 0.2500 | 1.0000 | ( 1 1 1) | 7.601A | 1 25.43  |
| ZD 1 | -0.2500 | 0.2500 | 0.5000 | (-1 1 0) | 7.601A | 1 25.43  |
| ZD 1 | -0.2500 | 0.7500 | 0.0000 | (-1 0 0) | 8.044A | 1 24.57  |
| ZD 1 | 0.2500  | 0.7500 | 1.5000 | ( 1 0 1) | 8.044A | 1 24.57  |

-----  
Structural group analysis  
-----

-----  
Structural group No 1  
-----

Structure consists of 3D framework with ZE1D

-----  
Coordination sequences  
-----

ZD1: 1 2 3 4 5 6 7 8 9 10  
Num 4 10 24 42 64 92 124 162 204 252  
Cum 5 15 39 81 145 237 361 523 727 979

ZE1: 1 2 3 4 5 6 7 8 9 10  
Num 4 10 24 42 64 90 124 162 204 250  
Cum 5 15 39 81 145 235 359 521 725 975

-----  
TD10=977

-----  
Vertex symbols for selected sublattice  
-----

ZD1 Point (Schlafli) symbol: {4<sup>2</sup>;8<sup>4</sup>}  
Extended point symbol: [4.4.8(2).8(2).8(8).8(8)]

ZE1 Point (Schlafli) symbol: {4<sup>2</sup>;8<sup>4</sup>}  
Extended point symbol: [4.4.8(7).8(7).8(7).8(7)]

-----  
Point (Schlafli) symbol for net: {4<sup>2</sup>;8<sup>4</sup>}  
4-c net; 2-nodal net

-----  
Topological type: pts PtS, Cooperite; sqc183 (topos&RCSR.ttd) {4<sup>2</sup>;8<sup>4</sup>} - VS [4.4.8(7).8(7).8(7).8(7)] [4.4.8(

-----  
Non-equivalent circuits  
-----

Circuit No 1; Type=4; Centroid: (0.000,0.500,0.500)

-----  
Atom x y z  
-----  
ZD1 -0.2500 0.7500 0.0000  
ZE1 0.0000 0.6002 0.7500  
ZD1 0.2500 0.2500 1.0000  
ZE1 0.0000 0.3998 0.2500

Circuit No 2; Type=8a; Centroid: (0.000,0.000,0.500)

-----  
Atom x y z  
-----  
ZD1 -0.2500 -0.2500 -0.0000  
ZE1 -0.5000 0.1002 -0.2500  
ZD1 -0.2500 0.2500 0.5000  
ZE1 0.0000 0.6002 0.7500  
ZD1 0.2500 0.2500 1.0000  
ZE1 0.5000 -0.1002 1.2500  
ZD1 0.2500 -0.2500 0.5000  
ZE1 0.0000 -0.6002 0.2500

Circuit No 3; Type=8b; Centroid: (0.000,0.950,0.250)

-----  
Atom x y z  
-----

|     |         |        |         |
|-----|---------|--------|---------|
| ZD1 | -0.2500 | 0.7500 | 0.0000  |
| ZE1 | -0.5000 | 0.8998 | -0.7500 |
| ZD1 | -0.2500 | 1.2500 | -0.5000 |
| ZE1 | 0.0000  | 1.3998 | 0.2500  |
| ZD1 | 0.2500  | 1.2500 | 1.0000  |
| ZE1 | 0.5000  | 0.8998 | 1.2500  |
| ZD1 | 0.2500  | 0.7500 | 0.5000  |
| ZE1 | 0.0000  | 0.3998 | 0.2500  |

Circuit No 4; Type=8c; Centroid: (0.500,0.500,0.000)

| Atom | x      | y      | z       |
|------|--------|--------|---------|
| ZD1  | 0.7500 | 0.7500 | 1.0000  |
| ZE1  | 0.5000 | 0.8998 | 0.2500  |
| ZD1  | 0.2500 | 0.7500 | -0.5000 |
| ZE1  | 0.0000 | 0.6002 | -1.2500 |
| ZD1  | 0.2500 | 0.2500 | -1.0000 |
| ZE1  | 0.5000 | 0.1002 | -0.2500 |
| ZD1  | 0.7500 | 0.2500 | 0.5000  |
| ZE1  | 1.0000 | 0.3998 | 1.2500  |

Circuit No 5; Type=8d; Centroid: (0.688,0.688,0.375)

| Atom | x      | y      | z       |
|------|--------|--------|---------|
| ZD1  | 0.7500 | 0.7500 | 1.0000  |
| ZE1  | 0.5000 | 0.8998 | 0.2500  |
| ZD1  | 0.2500 | 0.7500 | -0.5000 |
| ZE1  | 0.5000 | 1.1002 | -0.2500 |
| ZD1  | 0.7500 | 0.7500 | -0.0000 |
| ZE1  | 1.0000 | 0.6002 | 0.7500  |
| ZD1  | 0.7500 | 0.2500 | 0.5000  |
| ZE1  | 1.0000 | 0.3998 | 1.2500  |

Circuit No 6; Type=8e; Centroid: (0.750,0.750,0.500)

| Atom | x      | y      | z       |
|------|--------|--------|---------|
| ZD1  | 0.7500 | 0.7500 | 1.0000  |
| ZE1  | 0.5000 | 0.8998 | 0.2500  |
| ZD1  | 0.7500 | 1.2500 | 0.5000  |
| ZE1  | 0.5000 | 1.1002 | -0.2500 |
| ZD1  | 0.7500 | 0.7500 | -0.0000 |
| ZE1  | 1.0000 | 0.6002 | 0.7500  |
| ZD1  | 0.7500 | 0.2500 | 0.5000  |
| ZE1  | 1.0000 | 0.3998 | 1.2500  |

Circuit No 7; Type=8f; Centroid: (0.750,0.750,0.500)

| Atom | x      | y      | z       |
|------|--------|--------|---------|
| ZD1  | 0.7500 | 0.7500 | 1.0000  |
| ZE1  | 0.5000 | 0.8998 | 0.2500  |
| ZD1  | 0.2500 | 0.7500 | -0.5000 |
| ZE1  | 0.5000 | 1.1002 | -0.2500 |
| ZD1  | 0.7500 | 0.7500 | -0.0000 |
| ZE1  | 1.0000 | 0.6002 | 0.7500  |
| ZD1  | 1.2500 | 0.7500 | 1.5000  |
| ZE1  | 1.0000 | 0.3998 | 1.2500  |

Elapsed time: 13.44 sec.
